# Supplementary material for: Expressive Incoherence and Alexithymia in Autism Spectrum Disorder
Source: Springer Nature journal article supplement (doi:10.1007/s10803-017-3073-9), 2017-03-06
Supplement: MOESM1 [file 12115630]

Electronic Supplementary Material

Article title: Expressive Incoherence and Alexithymia in Autism Spectrum Disorder

Journal name: Journal of Autism and Developmental Disorders

Authors: Andreia P. Costa1, Georges Steffgen1, Andrea C. Samson2

Affiliation: 1University of Luxembourg; 2Swiss Center for Affective Sciences, University of Geneva

Email of corresponding author: andreia.pintocosta@uni.lu

Online Resource 1. Sample characteristics: Means (*M*), standard deviations (*SD*), ranges, sample size, Pearson’s chi square values, *t*-values, 2-tailed Fisher’s exact test, and significance levels (*p*) for age and gender differences between children with low-functioning ASD and children with high-functioning ASD and their parents.

|  | ASD-low  *M* (*SD*, range)  *n* = 20 | ASD-high  *M* (*SD*, range)  *n* = 17 | Statistics  (ASD-low / ASD-high) |
| --- | --- | --- | --- |
| Children |  |  |  |
| Male / Female | 17 / 3 | 15 / 2 | *χ*2(1) = 0.08, *p* = .77 |
| Age | 8.90 (2.76, 3-13) | 9.28 (2.46, 5-13) | *t*(35) = 0.43, *p* = .67 |
| Parents |  |  |  |
| Mother1 / Father | 14 / 6 | 17 / 0 | *p*<.05, 2-tailed Fisher’s exact test |
| Age | 41.61 (4.91, 33-53) | 40.94 (4.98, 35-53) | *t*(33) = 0.40, *p* = .69 |

*ASD-low* low-functioning autism spectrum disorder, *ASD-high* high-functioning autism spectrum disorder

1Two of the mothers of children with low-functioning ASD were grand-mothers who were the legal representatives of the child since the child was an infant.

Online Resource 2. Means (*M*), standard deviations (*SD*), *F*-values (MANOVA and ANOVA), and significance levels (*p*), of behavior valences, facial expression valences, and alexithymia for low- and high-functioning children with ASD.

|  | ASD-low  *M* (*SD*) | ASD-high  *M* (*SD*) | Statistics  (ASD-low / ASD-high) |
| --- | --- | --- | --- |
| Behavior valences |  |  | *F*(3,33)=2.50, *p*=.08 |
| Negative | 3.35 (2.98) | 1.71 (2.59) | *F*(1,35)=3.15,*p*=.09 |
| Neutral | 3.90 (2.65) | 6.41 (2.90) | *F*(1,35)=7.57,*p*<.01 |
| Positive | 1.55 (2.26) | 0.71 (1.26) | *F*(1,35)=1.87, *p*=.18 |
| Facial expression valences |  |  | *F*(3,33)=0.99,*p*=.41 |
| Negative | 1.95 (2.46) | 0.88 (1.41) | *F*(1,35)=2.50,*p*=.12 |
| Neutral | 5.20 (2.71) | 6.47 (3.04) | *F*(1,35)=1.81, *p*=.19 |
| Positive | 1.50 (2.04) | 1.47 (1.94 | *F*(1,35)=0.00, *p*=.97 |
| Alexithymia (AQC-P) | 19.35 (7.79) | 24.06 (5.23) | *F*(3,33)=1.45, *p*=.25 |
| Difficulty identifying feelings | 7.55 (3.41) | 8.94 (2.82) | *F*(1,35)=1.79, *p*=.19 |
| Difficulty describing feelings | 5.50 (3.17) | 7.00 (1.97) | *F*(1,35)=2.86, *p*=.10 |
| Externally oriented thinking | 6.30 (3.50) | 8.12 (2.62) | *F*(1,35)=3.11, *p*=.09 |

*ASD-low* low-functioning autism spectrum disorder, *ASD-high* high-functioning autism spectrum disorder, *AQC-P* Alexithymia Questionnaire for Children – Parent version (total score)

Online Resource 3. Means (*M*), standard deviations (*SD*), *F*-values (MANOVA and ANOVAs), and significance levels (*p*), of percentage of expressive incoherence for low- and high-functioning children with ASD; *F*-values (MANCOVA and ANCOVAs), and significance levels (*p*), for the same variables and sample after controlling for alexithymia (AQC-P).

|  | ASD-low  *M* (*SD*) | ASD-high  *M* (*SD*) | Statistics  (ASD-low / ASD-high) | Statistics (ASD-low / ASD-high)  (controlling for alexithymia) |
| --- | --- | --- | --- | --- |
| Expressive incoherence (%) |  |  |  |  |
| Total | 23.40 (28.33) | 13.40 (22.49) | *F*(3,33) = 1.39, *p* = .26 | *F*(3,32) = 0.97, *p* = .42 |
| Negative Beh./Neutral Expr. | 19.44 (32.11) | 6.86 (19.60) | *F*(1,35) = 1.98, *p* = .17 | *F*(1,34) = 1.01, *p* = .32 |
| Negative Beh./Positive Expr. | 22.08 (36.50) | 18.82 (33.79) | *F*(1,35) = 0.08, *p* = .78 | *F*(1,34) = 0.27, *p* = .61 |
| Positive Beh./Negative Expr. | 8.00 (25.46) | 0.00 (0.00) | *F*(1,35) = 1.67, *p* = .21 | *F*(1,34) = 1.44, *p* = .24 |

*ASD-low* low-functioning autism spectrum disorder, *ASD-high* high-functioning autism spectrum disorder, *Expr.* Facial expression valence, *Beh.* Behavior valence

Online Resource 4. MANCOVAs and ANCOVAs controlling for language of assessment, parental interaction, age, and gender effects on behavior valences, facial expression valences, and alexithymia (AQC-P) between children with ASD and TD children.

|  | Statistics (ASD/TD) | | |
| --- | --- | --- | --- |
|  | controlling for language of assessment effects | controlling for parental interaction effects | controlling for age and gender effects |
| Behavior valences | *F*(3,73)=9.35***, =.28 | *F*(3,71)=7.95***, =.25 | *F*(3,72)=10.70***, =.31 |
| Negative | *F*(1,75)=22.79***, =.23 | *F*(1,73)=19.27***, =.21 | *F*(1,74)=25.66***, =.26 |
| Neutral | *F*(1,75)=10.09**, =.12 | *F*(1,73)=11.52**, =.14 | *F*(1,74)=14.15***, =.16 |
| Positive | *F*(1,75)=1.66, =.02 | *F*(1,73)=0.22, =.00 | *F*(1,74)=1.37, =.02 |
| Facial expression valences | *F*(3,73)=11.46***, =.32 | *F*(3,71)=7.91***, =.25 | *F*(3,72)=11.69***, =.33 |
| Negative | *F*(1,75)=7.11**, =.09 | *F*(1,73)=7.93**, =.10 | *F*(1,74)=8.81**, =.11 |
| Neutral | *F*(1,75)=10.01**, =.12 | *F*(1,73)=3.01, =.04 | *F*(1,74)=6.47*, =.08 |
| Positive | *F*(1,75)=28.11***, =.27 | *F*(1,73)=15.18***, =.17 | *F*(1,74)=24.11***, =.25 |
| Alexithymia (AQC-P) | *F*(3,73)=13.54***, =.36 | *F*(3,71)=9.95***=.30 | *F*(3,72)=11.68***, =.33 |
| Difficulty identifying feelings | *F*(1,75)=40.73***, =.35 | *F*(1,73)=29.88***, =.29 | *F*(1,74)=35.16***, =.32 |
| Difficulty describing feelings | *F*(1,75)=15.88***, =.18 | *F*(1,73)=9.63**, =.12 | *F*(1,74)=13.49***, =.15 |
| Externally oriented thinking | *F*(1,75)=2.72, =.04 | *F*(1,73)=0.88, =.01 | *F*(1,74)=2.18, =.03 |

*ASD* autism spectrum disorder, *TD* typically developing, *AQC-P* Alexithymia Questionnaire for Children – Parent version (total score)

**p* < .05, ***p* < .01, ****p* < .001

Online Resource 5. Facial Action Coding System (Ekman & Friesen, 1978) coded facial events: action units, facial muscle description and the emotional facial expression that can be used to code the emotions: neutral, anger, fear, happiness, and sadness.

| Action Unit | Descriptor | Emotional facial expression |
| --- | --- | --- |
| 0 | Neutral face | neutral |
| 1 | Inner brow raiser | fear, sadness |
| 2 | Outer brow raiser | fear |
| 4 | Brow lowerer | anger, fear, sadness |
| 5 | Upper lid raiser | anger, fear |
| 6 | Cheek raiser | happiness, sadness |
| 7 | Lid tightener | anger, fear, happiness |
| 12 | Lip corner puller | happiness |
| 16 | Lower lip depressor | sadness |
| 17 | Chin raiser | sadness |
| 20 | Lip stretcher | fear |
| 23 | Lip tightener | anger |
| 26 | Jaw drop | fear |
| 27 | Mouth stretch | anger |
| 44 | Squint | anger, sadness |

Online Resource 6. Three-step Hierarchical Multiple Regression analysis for variables predicting positive emotional expression. Predictors: Gender, *z*-standardized alexithymia (AQC-P), *z*-standardized negative behavior, cross products of gender with AQC-P, gender with negative behavior, and negative behavior with AQC-P, and the cross product of the three.

| Variables | *β* | SE *β* |
| --- | --- | --- |
| Step 1 |  |  |
| Gender | 1.88* | 0.93 |
| Alexithymia (AQC-P) | -0.37 | 0.36 |
| Negative Beh. | -0.33 | 0.36 |
| Step 2 |  |  |
| Gender | 2.07* | 0.91 |
| AQC-P | -1.10 | 1.13 |
| Disrupt | 0.47 | 1.30 |
| Gender x AQC-P | -0.83 | 1.09 |
| Gender x Negative Beh. | 0.65 | 0.92 |
| Negative Beh. x AQC-P | 0.92* | 0.37 |
| Step 3 |  |  |
| Gender | 1.80 | 0.93 |
| AQC-P | -0.68 | 1.18 |
| Negative Beh | 1.43 | 1.50 |
| Gender x AQC-P | -1.83 | 1.34 |
| Gender x Negative Beh. | 0.23 | 0.97 |
| Negative Beh. x AQC-P | 2.94 | 1.63 |
| Gender x AQC-P x Negative Beh. | -1.90 | 1.50 |

*AQC-P* Alexithymia Questionnaire for Children – Parent version (total score), *Beh.* Behavior valence

*Note. R*2 = .08 for Step 1 (*p* = .09); Δ*R*2 = .10 for step 2 (*p* < .05); Δ*R*2 = .02 for step 3 (*p* = .21).

**p* < .05
